# Supplementary material for: Evolutionary Game Theory and Social Learning Can Determine How Vaccine Scares Unfold
Source: PLOS journal article supplement (doi:10.1371/journal.pcbi.1002452), 2012-04-05

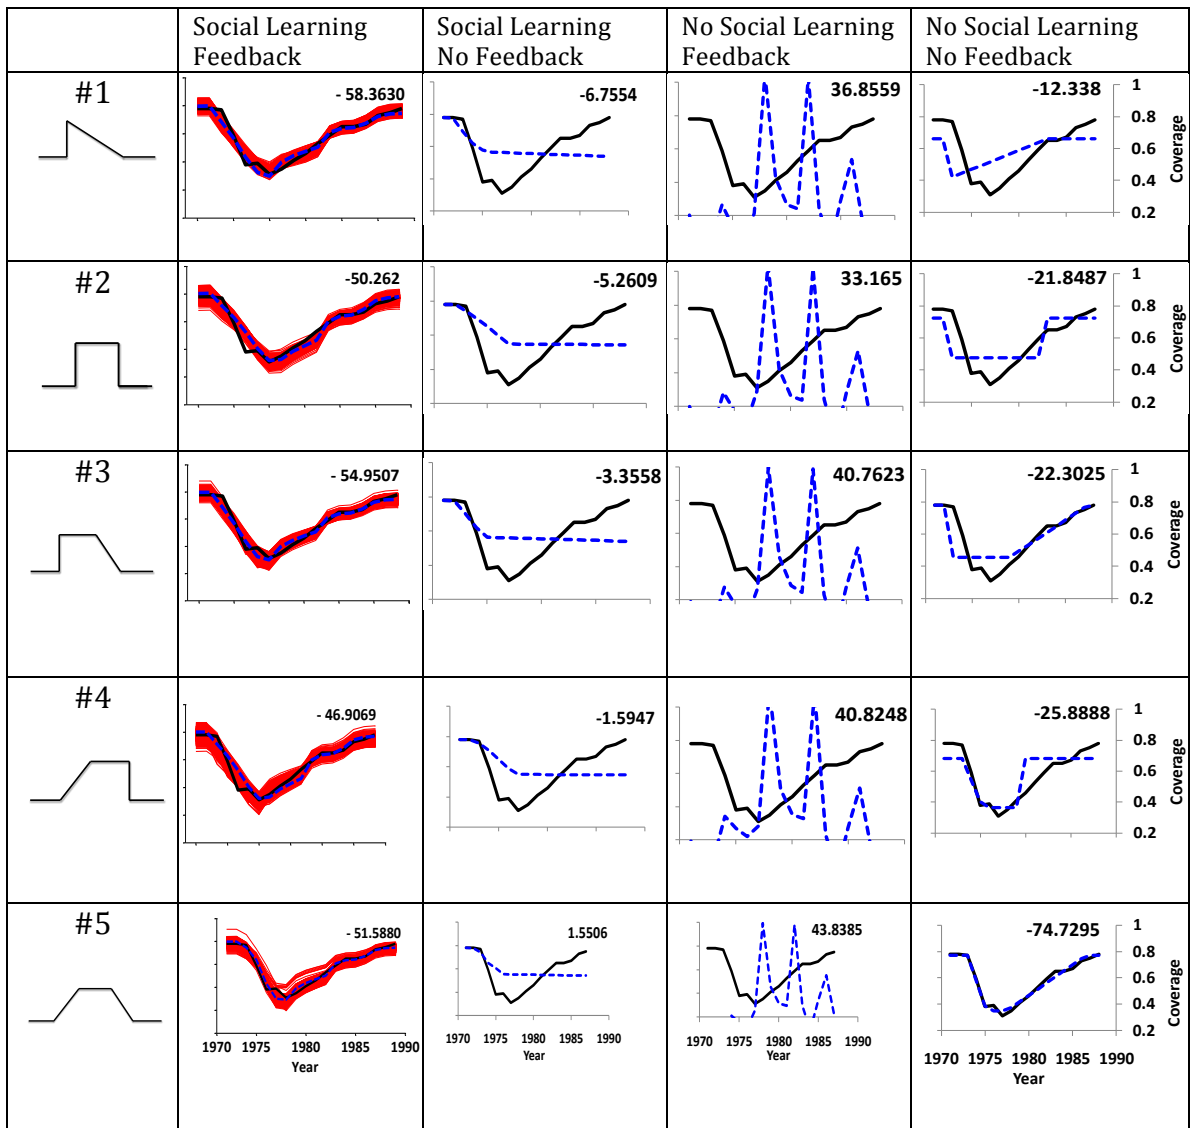

Supplement: S2 (10.1371/journal.pcbi.1002452.s002) [file journal.pcbi.1002452.s002]
