# Supplementary material for: Evolutionary Game Theory and Social Learning Can Determine How Vaccine Scares Unfold
Source: PLOS journal article supplement (doi:10.1371/journal.pcbi.1002452), 2012-04-05

## Best fit of model to MMR vaccine coverage data

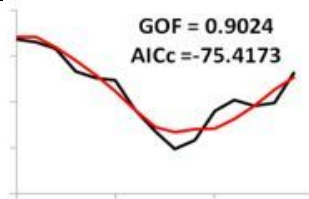

## Best fit of model to correlated white noise data

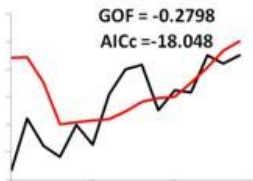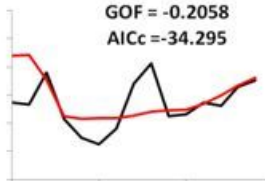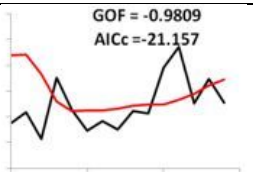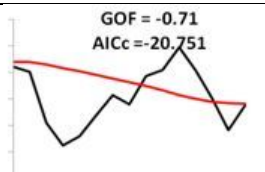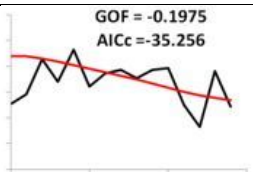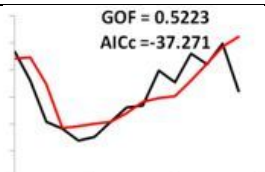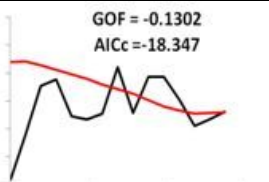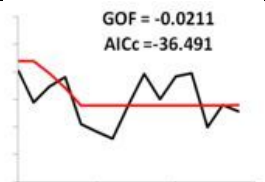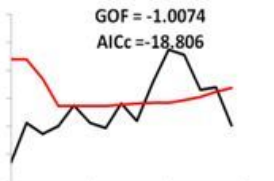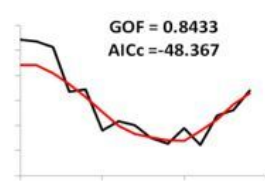

Supplement: S8 (10.1371/journal.pcbi.1002452.s008) [file journal.pcbi.1002452.s008]
