# Supplementary material for: Evolutionary Game Theory and Social Learning Can Determine How Vaccine Scares Unfold
Source: PLOS journal article supplement (doi:10.1371/journal.pcbi.1002452), 2012-04-05

# Best fit of model to MMR vaccine coverage data

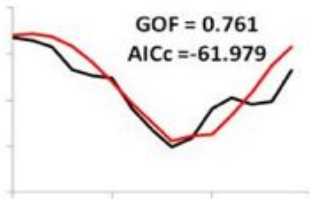

# Best fit of model to correlated white noise data

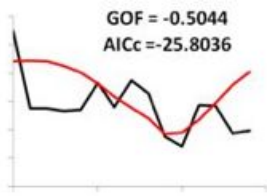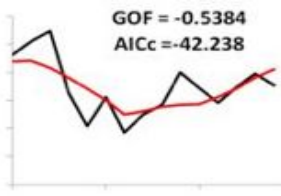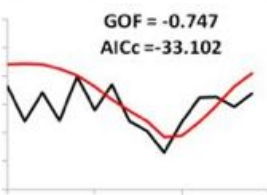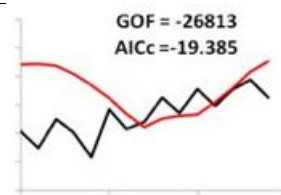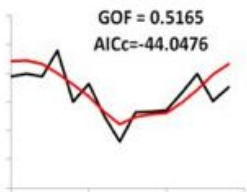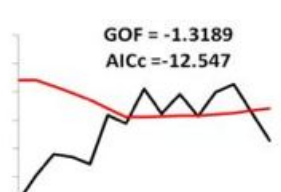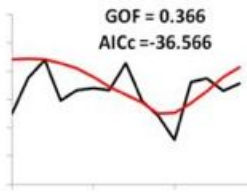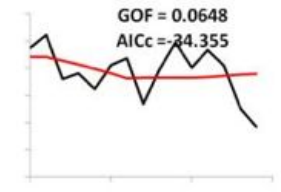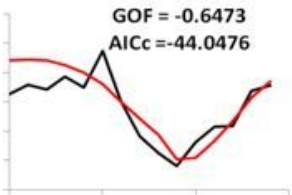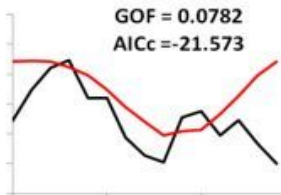

Supplement: S9 (10.1371/journal.pcbi.1002452.s009) [file journal.pcbi.1002452.s009]
